# Supplementary material
Source: Copernicus journal article supplement (doi:10.5194/hess-30-2775-2026)
Supplement: Supplementary file 1 [file hess-30-2775-2026-supplement.pdf]

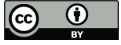

*Supplement of*

## **Understanding meteorological, runoff, and agricultural drought propagation and their influencing factors in an ensemble of multiple datasets**

**Yuanrui Liu et al.**

*Correspondence to:* Lei Yu ([yulei2018@zzu.edu.cn](mailto:yulei2018@zzu.edu.cn))

The copyright of individual parts of the supplement might differ from the article licence.

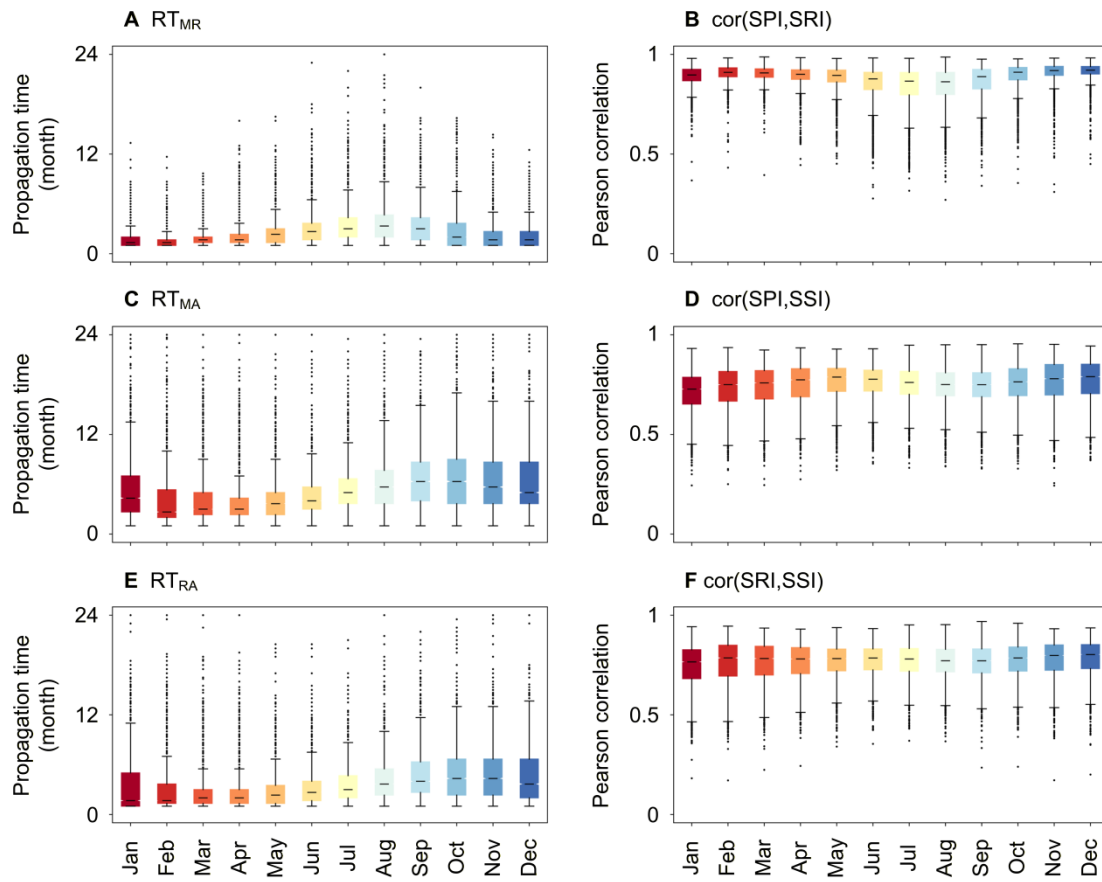

10

**Figure S1.** Box plots of  $RT_{MR}$ ,  $RT_{MA}$  and  $RT_{RA}$  for each calendar month in the Southern Hemisphere, along with the corresponding Pearson correlation coefficients.

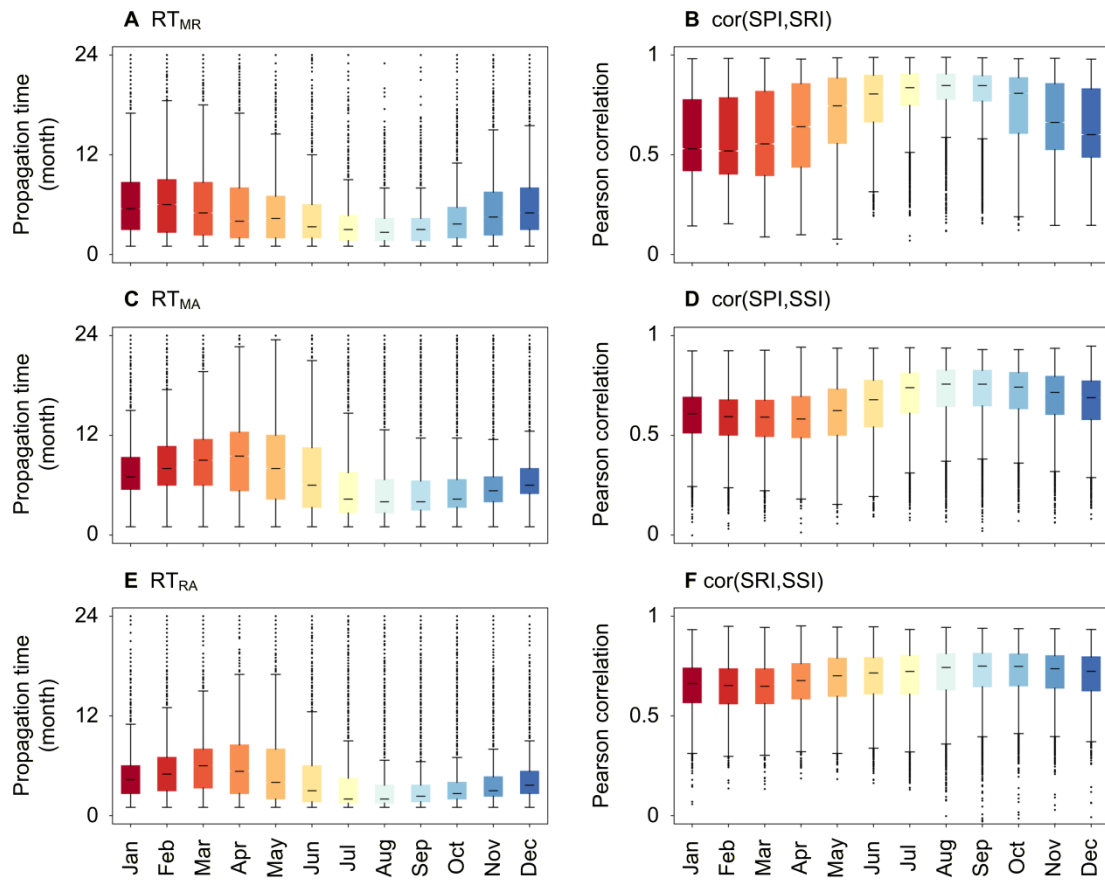

15 **Figure S2.** Box plots of  $RT_{MR}$ ,  $RT_{MA}$  and  $RT_{RA}$  for each calendar month in the Northern Hemisphere, along with the corresponding Pearson correlation coefficients

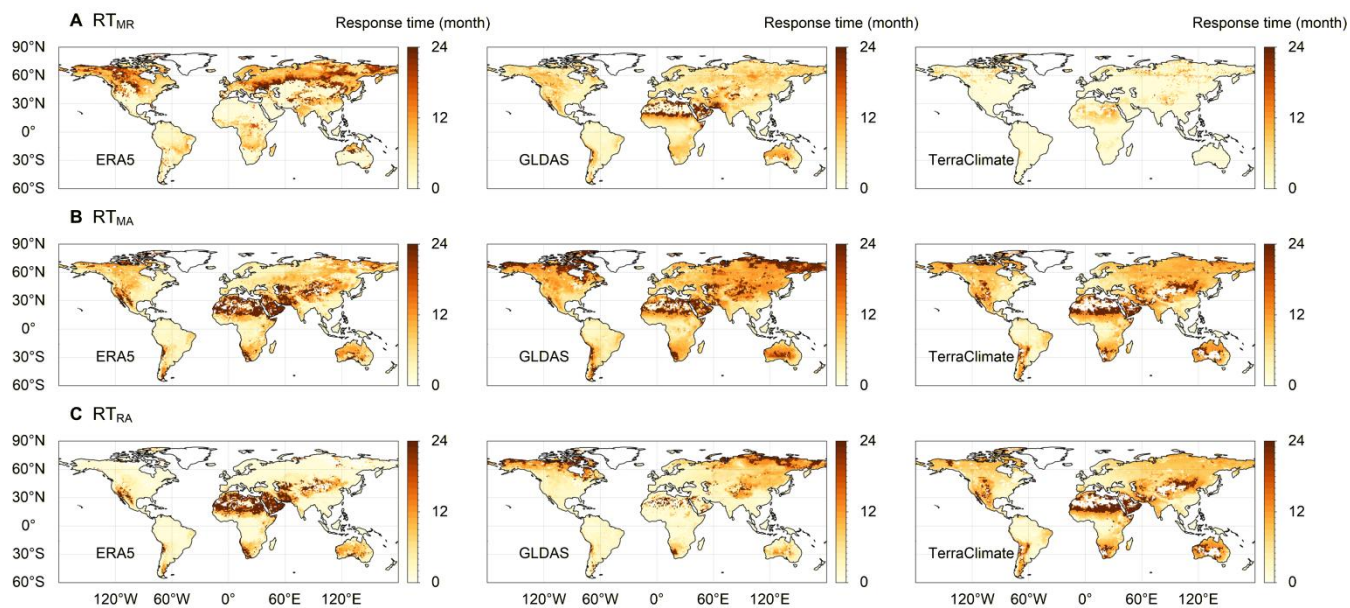

**Figure S3.** Spatial patterns of average  $RT_{MR}$ ,  $RT_{MA}$ , and  $RT_{RA}$  across global land areas in the ERA5, GLDAS, and TerraClimate datasets.

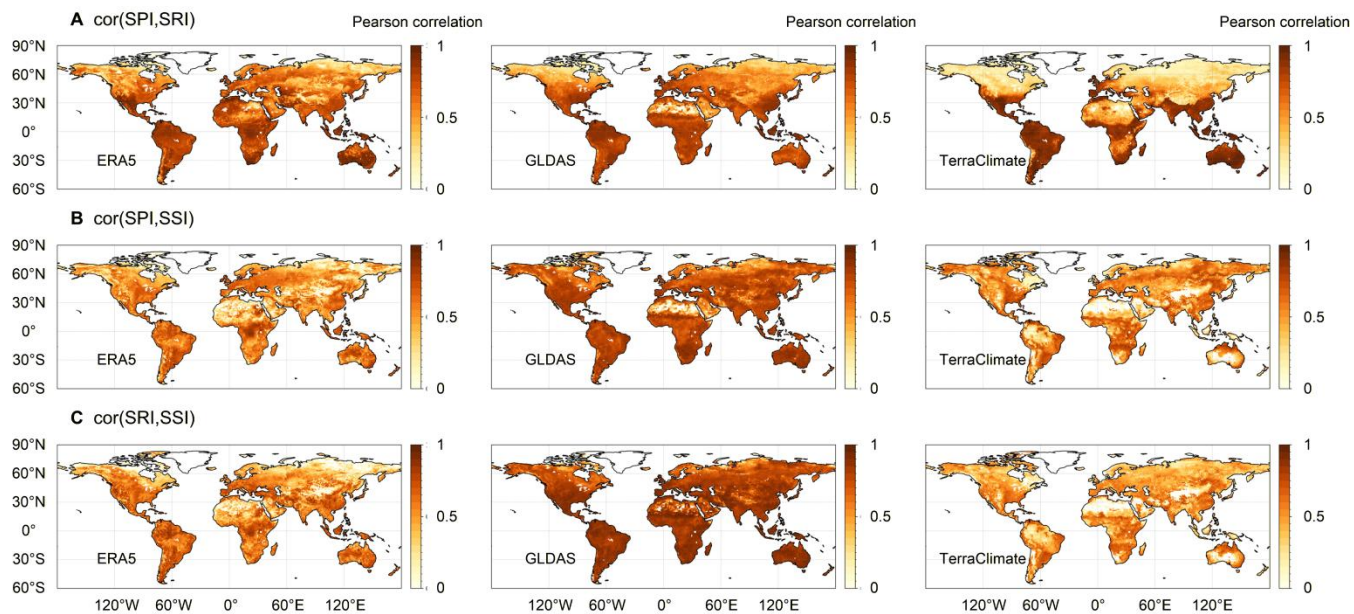

20 **Figure S4.** Spatial patterns of maximum Pearson correlation coefficients for  $\text{RT}_{\text{MR}}$ ,  $\text{RT}_{\text{MA}}$ , and  $\text{RT}_{\text{RA}}$  across global land areas in the ERA5, GLDAS, and TerraClimate datasets.

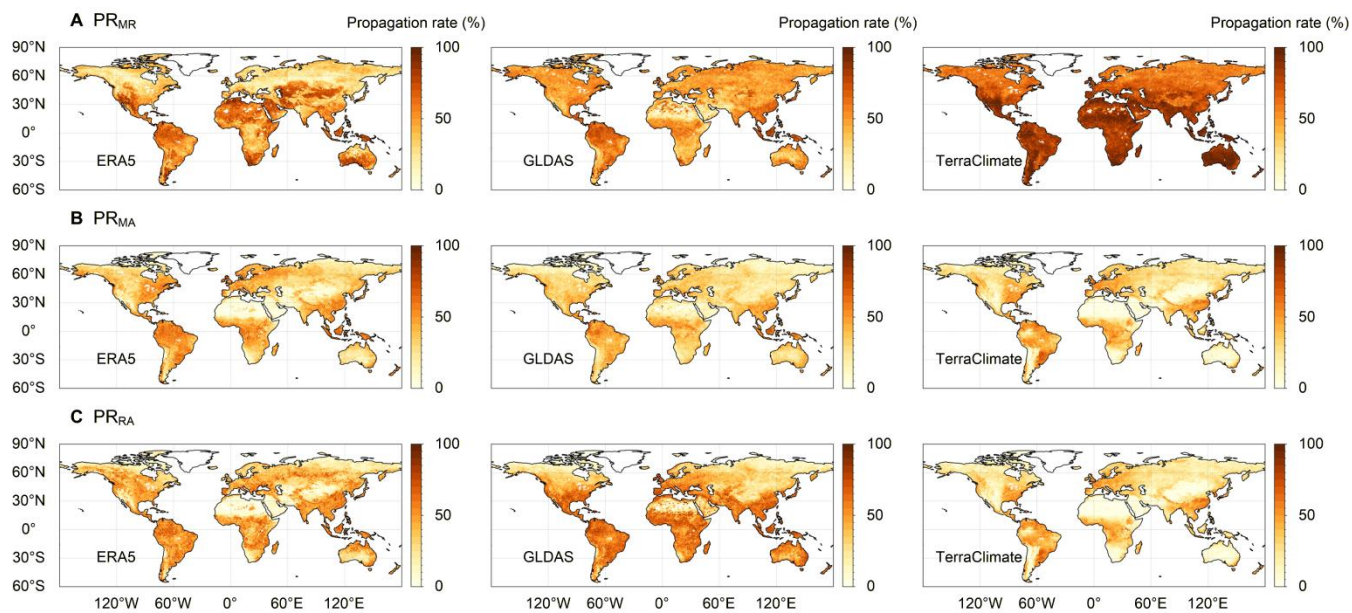

**Figure S5.** Spatial patterns of average  $PR_{MR}$ ,  $PR_{MA}$ , and  $PR_{RA}$  across global land areas in the ERA5, GLDAS, and TerraClimate datasets.

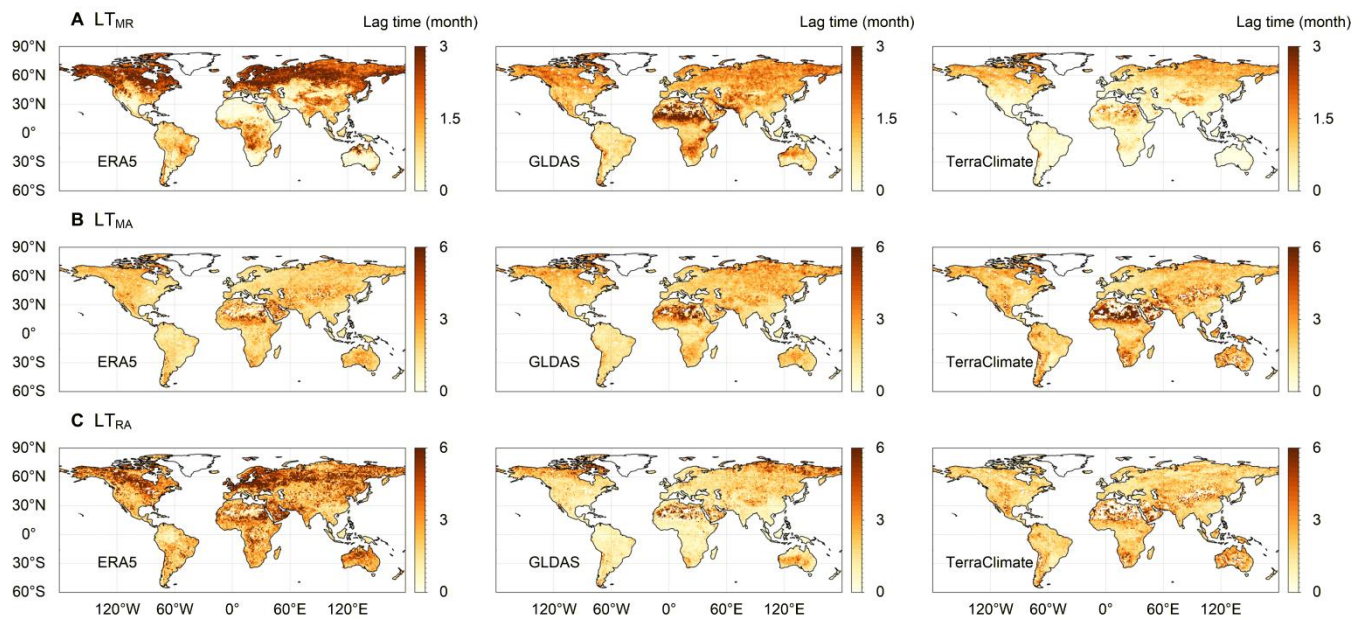

**Figure S6.** Spatial patterns of average  $LT_{MR}$ ,  $LT_{MA}$ , and  $LT_{RA}$  across global land areas in the ERA5, GLDAS, and TerraClimate datasets.

**Table S1.** The performance metrics in validation sets for each XGBoost model

| Model name     | RT <sub>MR</sub> | RT <sub>MA</sub> | RT <sub>RA</sub> | PR <sub>MR</sub> | PR <sub>MA</sub> | PR <sub>RA</sub> | LT <sub>MR</sub> | LT <sub>MA</sub> | LT <sub>RA</sub> |
|----------------|------------------|------------------|------------------|------------------|------------------|------------------|------------------|------------------|------------------|
| R <sup>2</sup> | 0.653            | 0.878            | 0.858            | 0.824            | 0.944            | 0.913            | 0.646            | 0.581            | 0.652            |
| RMSE           | 1.736            | 1.779            | 1.667            | 4.613            | 3.252            | 4.416            | 1.177            | 4.221            | 1.411            |
